# Supplementary material for: Route-dependent Dissemination with Conserved Blood–Tumor Barrier Ultrastructure in Intracranial Metastasis Models
Source: Research Square preprint supplement (doi:10.21203/rs.3.rs-8038462/v1), 2025-12-12
Supplement: Supplementary file 1 [file ad4c616d3692cad56b8f47f6.xlsx]

## Sheet: Sheet1
Article Title: Route-dependent Dissemination with Conserved Blood–Tumor Barrier Ultrastructure in Intracranial Metastasis Models
Journal: Brain Structure and Function
Corresponding Author: Dan Li, MD Affiliation: Institute of Respiratory Health, Frontiers Science Center for Disease-related Molecular Network, and Precision Medicine Research Center, Precision Medicine Key Laboratory of Sichuan Province, West China Hospital, Sichuan University, Chengdu, Sichuan 610041, P.R. China. Email: lidan@wchscu.cn Yongsheng Wang, MD Affiliation: Thoracic Oncology Ward, Canc…
Authors: Jian Zhao¹, Yuehua Zhang², Zhigong Wei³, Kai Li¹, Dan Li⁴*, Yongsheng Wang¹*
Online Resource 1: A Comprehensive Comparative Guide for the Selection of Brain Metastasis Mouse Models
Feature	Spontaneous Metastasis Model	Left Ventricle (Intracardiac) Model	Modified ICA (m-ICA) Model	Conventional ICA Model	Intracranial (IC) Model
Seeding Mechanism	Complete metastatic cascade (orthotopic origin)	Hematogenous (systemic arterial)	Hematogenous (brain-selective arterial)	Hematogenous (arterial)	Direct parenchymal injection
Physiological Relevance	Very High (mimics clinical disease progression)	High (simulates late-stage systemic spread)	High (high-fidelity simulation of brain colonization)	Medium (simulates arterial seeding but flawed)	Low (bypasses entire metastatic cascade)
Tumor Pattern	Variable, often multifocal	Multifocal, disseminated	Multifocal, disseminated	Multifocal, disseminated	Unifocal, expansive
Extracranial Burden	Very High (major confounder, often requires primary tumor resection)	Very High (major confounder, limits brain-specific study)	Negligible / Eliminated	Severe (confounds BLI quantification)	None
Reproducibility	Low (high variability, long latency)	Medium	High	Low to Medium	Very High
Technical Difficulty	Very High (orthotopic injection, surgery, long-term monitoring)	High (technically demanding freehand injection)	Medium (vascular surgery + ligation)	Medium (vascular surgery)	Low to Medium (stereotactic injection)
Core Advantages	Recapitulates entire metastatic cascade; ideal for prevention studies.	Simulates systemic arterial dissemination; multifocal pattern.	Brain-specific hematogenous model with no signal interference.	Simulates arterial seeding.	High reproducibility, precise localization, rapid.
Core Disadvantages	Long latency, low incidence, high cost, confounded by systemic metastases.	High systemic tumor burden is a major confounder; technically challenging.	Technically more demanding than IC; bypasses early metastatic steps.	Severe extracranial contamination; unreliable quantification.	Bypasses critical physiological steps (e.g., BBB crossing).
Recommended Use	Studying the complete metastatic process, pre-metastatic niche, and prevention strategies.	Studying late-stage systemic dissemination and multi-organ metastasis including brain.	Studying BBB crossing, vascular co-option, and brain-targeted systemic therapies.	Not Recommended (superseded by m-ICA model).	Studying biology of established tumors, drug penetration/efficacy within the tumor, and high-throughput screening.
